# Supplementary material for: Bee Venom Melittin Disintegrates the Respiration of Mitochondria in Healthy Cells and Lymphoblasts, and Induces the Formation of Non-Bilayer Structures in Model Inner Mitochondrial Membranes
Source: MDPI journal article supplement (doi:10.3390/ijms222011122), 2021-10-15
Supplement: s1 [file s1]

# Bee Venom Melittin Disintegrates Respiration of Mitochondria in Healthy and Leukemia Lymphocytes and Induces Formation of Non-bilayer Structures in Model Inner Mitochondrial Membranes

Edward Gasanoff, Yipeng Liu, Feng Li, Paul Hanlon, and Gy  z   Garab

## Supplementary materials

**Table S1.** Summary of the charged and polar groups of amino acid residues in the melittin binding sites that interact with polar head groups of truncated CL. Hypothetical binding sites in melittin that bind to the charged and polar groups of CL polar head were determined by AutoDock modeling. Designation of CL polar head groups is shown in Figure S1. Pb in  $\text{NH}^{\delta+}_{\text{pb}}$  and  $\text{C}=\text{O}^{\delta-}_{\text{pb}}$  denotes a peptide bond.

| Binding site # and Affinity Energy Values        | CL Polar Head Groups                                                                                                                                                                                                                                                                   | Melittin a. a. Residues Interacting with CL Head                                                                                                                                                                                                                                                                                                        | Bond Type                                                                                                    |
|--------------------------------------------------|----------------------------------------------------------------------------------------------------------------------------------------------------------------------------------------------------------------------------------------------------------------------------------------|---------------------------------------------------------------------------------------------------------------------------------------------------------------------------------------------------------------------------------------------------------------------------------------------------------------------------------------------------------|--------------------------------------------------------------------------------------------------------------|
| <i>Binding site 1</i><br>Affinity: -4.1 kcal/mol | a- $\text{PO}_4^-$<br>b- $\text{PO}_4^-$<br>b- $\text{PO}_4^-$<br>$\text{CO}^{\delta-}\text{-H}$<br>$\text{CO}^{\delta-}\text{-H}$<br>I- $\text{C}=\text{O}^{\delta-}$<br>I- $\text{C}=\text{O}^{\delta-}$<br>IV- $\text{C}=\text{O}^{\delta-}$<br>4-I- $\text{CO}^{\delta-}\text{-C}$ | R22 ( $\text{CNH}_2^{\delta+}$ )<br>R22 ( $\text{CNH}^{\delta+}\text{C}$ )<br>Q26 ( $\text{CNH}_2^{\delta+}$ )<br>R22 ( $\text{CNH}_2^{\delta+}$ )<br>R22 ( $\text{CNH}^{\delta+}\text{C}$ )<br>R22( $\text{C}=\text{N}^+\text{H}_2$ )<br>S18( $\text{C}-\text{OH}^{\delta+}$ )<br>Q25 ( $\text{CNH}_2^{\delta+}$ )<br>Q26 ( $\text{CNH}_2^{\delta+}$ ) | ion-polar<br>ion-polar<br>ion-polar<br>hydrogen<br>hydrogen<br>ion-polar<br>hydrogen<br>hydrogen<br>hydrogen |
| <i>Binding site 2</i><br>Affinity: -4.0 kcal/mol | b- $\text{PO}_4^-$<br>a- $\text{PO}_4^-$<br>a- $\text{PO}_4^-$<br>b- $\text{PO}_4^-$<br>$\text{CO}^{\delta-}\text{-H}$<br>I- $\text{C}=\text{O}^{\delta-}$                                                                                                                             | R22( $\text{C}=\text{N}^+\text{H}_2$ )<br>R22 ( $\text{CNH}_2^{\delta+}$ )<br>R22 ( $\text{CNH}^{\delta+}\text{C}$ )<br>R22 ( $\text{CNH}_2^{\delta+}$ )<br>R22 ( $\text{CNH}_2^{\delta+}$ )<br>Q26 ( $\text{CNH}_2^{\delta+}$ )                                                                                                                        | ionic<br>ion-polar<br>ion-polar<br>ion-polar<br>hydrogen<br>hydrogen                                         |
| <i>Binding site 3</i><br>Affinity: -4.0 kcal/mol | a- $\text{PO}_4^-$<br>b- $\text{PO}_4^-$<br>b- $\text{PO}_4^-$<br>b- $\text{PO}_4^-$<br>2- $\text{CO}^{\delta-}\text{-C}$<br>II- $\text{C}=\text{O}^{\delta-}$<br>4-I- $\text{CO}^{\delta-}\text{-C}$                                                                                  | W19 ( $\text{CNH}^{\delta+}\text{C}$ )<br>W19 ( $\text{CNH}^{\delta+}\text{C}$ )<br>Q26 ( $\text{CNH}_2^{\delta+}$ )<br>R22 ( $\text{CNH}_2^{\delta+}$ )<br>R22 ( $\text{CNH}^{\delta+}\text{C}$ )<br>R22 ( $\text{CNH}_2^{\delta+}$ )<br>R22( $\text{C}=\text{N}^+\text{H}_2$ )<br>Q26 ( $\text{CNH}_2^{\delta+}$ )                                    | ion-polar<br>ion-polar<br>ion-polar<br>ion-polar<br>hydrogen<br>hydrogen<br>ion-polar<br>hydrogen            |
| <i>Binding site 4</i><br>Affinity:               | II- $\text{C}=\text{O}^{\delta-}$<br>IV- $\text{C}=\text{O}^{\delta-}$                                                                                                                                                                                                                 | T11 ( $\text{C}-\text{OH}^{\delta+}$ )<br>W19 ( $\text{CNH}^{\delta+}\text{C}$ )                                                                                                                                                                                                                                                                        | hydrogen<br>hydrogen                                                                                         |

|                                                  |                                                                                                                                                                                                                                         |                                                                                                                                                                                                                                                                                                               |                                                                                                 |
|--------------------------------------------------|-----------------------------------------------------------------------------------------------------------------------------------------------------------------------------------------------------------------------------------------|---------------------------------------------------------------------------------------------------------------------------------------------------------------------------------------------------------------------------------------------------------------------------------------------------------------|-------------------------------------------------------------------------------------------------|
| -3.9 kcal/mol                                    | CL head hydrophobic surface                                                                                                                                                                                                             | 12G,13L,14P,<br>15A,16L,17I                                                                                                                                                                                                                                                                                   | hydrophobic                                                                                     |
| <i>Binding site 5</i><br>Affinity: -3.9 kcal/mol | a-PO <sub>4</sub> <sup>-</sup><br>b-PO <sub>4</sub> <sup>-</sup><br>b-PO <sub>4</sub> <sup>-</sup><br>I-C=O <sup>δ-</sup><br>II-C=O <sup>δ-</sup><br>CO <sup>δ-</sup> -H<br>CO <sup>δ-</sup> -H<br>4-CO <sup>δ-</sup> -C                | W19 (CNH <sup>δ+</sup> C)<br>R22 (CNH <sup>δ+</sup> C)<br>Q26 (CNH <sub>2</sub> <sup>δ+</sup> )<br>R22 (CNH <sub>2</sub> <sup>δ+</sup> )<br>R22 (CNH <sub>2</sub> <sup>δ+</sup> )<br>R22 (CNH <sub>2</sub> <sup>δ+</sup> )<br>R22 (CNH <sup>δ+</sup> C)<br>Q25 (CNH <sub>2</sub> <sup>δ+</sup> )              | ion-polar<br>ion-polar<br>ion-polar<br>hydrogen<br>hydrogen<br>hydrogen<br>hydrogen<br>hydrogen |
| <i>Binding site 6</i><br>Affinity: -3.9 kcal/mol | a-PO <sub>4</sub> <sup>-</sup><br>a-PO <sub>4</sub> <sup>-</sup><br>a-PO <sub>4</sub> <sup>-</sup><br>a-PO <sub>4</sub> <sup>-</sup><br>1-CO <sup>δ-</sup> -C<br>CO <sup>δ-</sup> -H<br>b-PO <sub>4</sub> <sup>-</sup>                  | Q26 (CNH <sub>2</sub> <sup>δ+</sup> )<br>R22 (CNH <sub>2</sub> <sup>δ+</sup> )<br>R22 (CNH <sup>δ+</sup> C)<br>W19 (CNH <sup>δ+</sup> C)<br>W19 (CNH <sup>δ+</sup> C)<br>R22 (CNH <sub>2</sub> <sup>δ+</sup> )<br>R22 (CNH <sub>2</sub> <sup>δ+</sup> )                                                       | ion-polar<br>ion-polar<br>ion-polar<br>ion-polar<br>hydrogen<br>hydrogen<br>ion-polar           |
| <i>Binding site 7</i><br>Affinity: -3.9 kcal/mol | a-PO <sub>4</sub> <sup>-</sup><br>a-PO <sub>4</sub> <sup>-</sup><br>II-C=O <sup>δ-</sup><br>COH <sup>δ+</sup><br>b-PO <sub>4</sub> <sup>-</sup>                                                                                         | R24 (C=N <sup>+</sup> H <sub>2</sub> )<br>R24 (CNH <sub>2</sub> <sup>δ+</sup> )<br>R24 (CNH <sub>2</sub> <sup>δ+</sup> )<br>R24 (C=O <sup>δ-</sup> <sub>pb</sub> )<br>R24 (C=N <sup>+</sup> H <sub>2</sub> )                                                                                                  | ionic<br>ion-polar<br>hydrogen<br>hydrogen<br>ionic                                             |
| <i>Binding site 8</i><br>Affinity: -3.9 kcal/mol | b-PO <sub>4</sub> <sup>-</sup><br>b-PO <sub>4</sub> <sup>-</sup><br>b-PO <sub>4</sub> <sup>-</sup><br>3-CO <sup>δ-</sup> -C<br>CO <sup>δ-</sup> -H<br>II-C=O <sup>δ-</sup><br>II-C=O <sup>δ-</sup>                                      | R22 (C=N <sup>+</sup> H <sub>2</sub> )<br>R22 (CNH <sub>2</sub> <sup>δ+</sup> )<br>Q26 (CNH <sub>2</sub> <sup>δ+</sup> )<br>Q26 (CNH <sub>2</sub> <sup>δ+</sup> )<br>W19 (CNH <sup>δ+</sup> C)<br>R22 (C=N <sup>+</sup> H <sub>2</sub> )<br>R22 (CNH <sub>2</sub> <sup>δ+</sup> )                             | ionic<br>ion-polar<br>ion-polar<br>hydrogen<br>hydrogen<br>ion-polar<br>hydrogen                |
| <i>Binding site 9</i><br>Affinity: -3.9 kcal/mol | a-PO <sub>4</sub> <sup>-</sup><br>a-PO <sub>4</sub> <sup>-</sup><br>b-PO <sub>4</sub> <sup>-</sup><br>b-PO <sub>4</sub> <sup>-</sup><br>3-CO <sup>δ-</sup> -C<br>3-CO <sup>δ-</sup> -C<br>III-C=O <sup>δ-</sup><br>IV-C=O <sup>δ-</sup> | R22 (C=N <sup>+</sup> H <sub>2</sub> )<br>R22 (CNH <sub>2</sub> <sup>δ+</sup> )<br>R22 (CNH <sub>2</sub> <sup>δ+</sup> )<br>R22 (CNH <sup>δ+</sup> C)<br>R22 (CNH <sup>δ+</sup> C)<br>Q26 (CNH <sub>2</sub> <sup>δ+</sup> )<br>Q26 (CNH <sub>2</sub> <sup>δ+</sup> )<br>Q26 (CNH <sub>2</sub> <sup>δ+</sup> ) | ionic<br>ion-polar<br>ion-polar<br>ion-polar<br>hydrogen<br>hydrogen<br>hydrogen<br>hydrogen    |

**Table S2.** Summary of the charged and polar groups of amino acid residues in the melittin binding sites that interact with polar head groups of truncated PS. Hypothetical binding sites in melittin that bind to the charged and polar groups of PS polar head were determined by AutoDock modeling. Designation of PS polar head groups is shown in Figure S1. Pb in  $\text{NH}^{\delta+}_{\text{pb}}$  denotes a peptide bond.

| Binding Site # and Affinity Energy Values        | PS Polar Head Groups                                                                                                                     | Melittin a. a. Residues Interacting with PS Head                                                                                                                                                                                    | Bond Type                                                                 |
|--------------------------------------------------|------------------------------------------------------------------------------------------------------------------------------------------|-------------------------------------------------------------------------------------------------------------------------------------------------------------------------------------------------------------------------------------|---------------------------------------------------------------------------|
| <i>Binding site 1</i><br>Affinity: -3.8 kcal/mol | $\text{PO}_4^-$<br>$\text{I-C=O}^{\delta-}$<br>$\text{I-C=O}^{\delta-}$<br>$\text{II-C=O}^{\delta-}$<br>$\text{COO}^-$<br>$\text{COO}^-$ | R22 ( $\text{CNH}_2^{\delta+}$ )<br>R22 ( $\text{C=N}^+\text{H}_2$ )<br>R22 ( $\text{CNH}_2^{\delta+}$ )<br>A15 ( $\text{NH}^{\delta+}_{\text{pb}}$ )<br>R22 ( $\text{CNH}^{\delta+}\text{C}$ )<br>Q26 ( $\text{CNH}_2^{\delta+}$ ) | ion-polar<br>ionic<br>ion-polar<br>ion-polar<br>ion-polar<br>ion-polar    |
| <i>Binding site 2</i><br>Affinity: -3.7 kcal/mol | $\text{PO}_4^-$<br>$\text{PO}_4^-$<br>$\text{COO}^-$<br>$\text{COO}^-$<br>$\text{COO}^-$<br>$\text{I-C=O}^{\delta-}$                     | R22 ( $\text{CNH}^{\delta+}\text{C}$ )<br>Q26 ( $\text{CNH}_2^{\delta+}$ )<br>R22 ( $\text{CNH}_2^{\delta+}$ )<br>R22 ( $\text{CNH}^{\delta+}\text{C}$ )<br>Q26 ( $\text{CNH}_2^{\delta+}$ )<br>Q25 ( $\text{CNH}_2^{\delta+}$ )    | ion-polar<br>ion-polar<br>ion-polar<br>ion-polar<br>ion-polar<br>hydrogen |
| <i>Binding site 3</i><br>Affinity: -3.6 kcal/mol | $\text{PO}_4^-$<br>$\text{COO}^-$<br>$\text{COO}^-$<br>$\text{II-C=O}^{\delta-}$                                                         | L16 ( $\text{NH}^{\delta+}_{\text{pb}}$ )<br>R22 ( $\text{CNH}_2^{\delta+}$ )<br>W19 ( $\text{NH}^{\delta+}_{\text{pb}}$ )<br>L13 ( $\text{NH}^{\delta+}_{\text{pb}}$ )                                                             | ion-polar<br>ion-polar<br>ion-polar<br>hydrogen                           |
| <i>Binding site 4</i><br>Affinity: -3.6 kcal/mol | $\text{COO}^-$<br>$\text{COO}^-$<br>$\text{I-C=O}^{\delta-}$                                                                             | R22 ( $\text{C=N}^+\text{H}_2$ )<br>R22 ( $\text{CNH}_2^{\delta+}$ )<br>L13 ( $\text{NH}^{\delta+}_{\text{pb}}$ )                                                                                                                   | ionic<br>ion-polar<br>hydrogen                                            |
| <i>Binding site 5</i><br>Affinity: -3.6 kcal/mol | $\text{PO}_4^-$<br>$\text{COO}^-$<br>$\text{II-C=O}^{\delta-}$<br>$2\text{-CO}^{\delta-}\text{C}$                                        | Q25 ( $\text{CNH}_2^{\delta+}$ )<br>R22 ( $\text{C=N}^+\text{H}_2$ )<br>Q26 ( $\text{CNH}_2^{\delta+}$ )<br>Q26 ( $\text{CNH}_2^{\delta+}$ )                                                                                        | ion-polar<br>ionic<br>hydrogen<br>hydrogen                                |
| <i>Binding site 6</i><br>Affinity: -3.6 kcal/mol | $\text{PO}_4^-$<br>$\text{I-C=O}^{\delta-}$<br>$\text{N}^+\text{H}_3$<br>$\text{COO}^-$                                                  | K21 ( $\text{CN}^+\text{H}_3$ )<br>K21 ( $\text{CN}^+\text{H}_3$ )<br>S18 ( $\text{CO}^{\delta-}\text{H}$ )<br>Q25 ( $\text{CNH}_2^{\delta+}$ )                                                                                     | ionic<br>ion-polar<br>ion-polar<br>ion-polar                              |
| <i>Binding site 7</i><br>Affinity: -3.6 kcal/mol | $\text{PO}_4^-$<br>$\text{PO}_4^-$<br>$1\text{-CO}^{\delta-}\text{C}$<br>$1\text{-CO}^{\delta-}\text{C}$<br>$\text{I-C=O}^{\delta-}$     | R22 ( $\text{C=N}^+\text{H}_2$ )<br>S18 ( $\text{COH}^{\delta+}$ )<br>R22 ( $\text{C=N}^+\text{H}_2$ )<br>S18 ( $\text{COH}^{\delta+}$ )<br>R22 ( $\text{CNH}_2^{\delta+}$ )                                                        | ionic<br>ion-polar<br>ion-polar<br>hydrogen<br>hydrogen                   |

|                                                  |                                                                  |                                                                                                                          |                                    |
|--------------------------------------------------|------------------------------------------------------------------|--------------------------------------------------------------------------------------------------------------------------|------------------------------------|
|                                                  | 2-CO <sup>δ-</sup> C                                             | S18 (COH <sup>δ+</sup> )                                                                                                 | hydrogen                           |
| <i>Binding site 8</i><br>Affinity: -3.5 kcal/mol | COO <sup>-</sup><br>N <sup>+</sup> H <sub>3</sub>                | K7 (CN <sup>+</sup> H <sub>3</sub> )<br>T11 (CO <sup>δ-</sup> H)                                                         | ionic<br>ion-polar                 |
| <i>Binding site 9</i><br>Affinity: -3.5 kcal/mol | COO <sup>-</sup><br>II-C=O <sup>δ-</sup><br>II-C=O <sup>δ-</sup> | L13 (NH <sup>δ+</sup> <sub>pb</sub> )<br>R22 (CNH <sub>2</sub> <sup>δ+</sup> )<br>R22 (C=N <sup>+</sup> H <sub>2</sub> ) | ion-polar<br>hydrogen<br>ion-polar |

**Table S3.** Summary of the charged and polar groups of amino acid residues in the melittin binding sites that interact with polar head groups of truncated PC. Hypothetical binding sites in melittin that bind to the charged and polar groups of PC polar head were determined by AutoDock modeling. Designation of PC polar head groups is shown in Figure S1. Pb in NH<sup>δ+</sup><sub>pb</sub> denotes a peptide bond.

| <b>Binding Site # and Affinity Energy Values</b> | <b>PC Polar Head Groups</b>                                                                                                                                                  | <b>Melittin a. a. Residues Interacting with PC Head</b>                                                                                                                                                                   | <b>Bond Type</b>                                                         |
|--------------------------------------------------|------------------------------------------------------------------------------------------------------------------------------------------------------------------------------|---------------------------------------------------------------------------------------------------------------------------------------------------------------------------------------------------------------------------|--------------------------------------------------------------------------|
| <i>Binding site 1</i><br>Affinity: -3.3 kcal/mol | PO <sub>4</sub> <sup>-</sup><br>PO <sub>4</sub> <sup>-</sup><br>PO <sub>4</sub> <sup>-</sup><br>PO <sub>4</sub> <sup>-</sup><br>1-CO <sup>δ-</sup> C<br>2-CO <sup>δ-</sup> C | W19 (CNH <sup>δ+</sup> C)<br>R22(CNH <sub>2</sub> <sup>δ+</sup> )<br>R22 (CNH <sup>δ+</sup> C)<br>Q26 (CNH <sub>2</sub> <sup>δ+</sup> )<br>Q26 (CNH <sub>2</sub> <sup>δ+</sup> )<br>Q26 (CNH <sub>2</sub> <sup>δ+</sup> ) | ion-polar<br>ion-polar<br>ion-polar<br>ion-polar<br>hydrogen<br>hydrogen |
| <i>Binding site 2</i><br>Affinity: -3.2 kcal/mol | PO <sub>4</sub> <sup>-</sup><br>PO <sub>4</sub> <sup>-</sup><br>PO <sub>4</sub> <sup>-</sup>                                                                                 | R22 (C=N <sup>+</sup> H <sub>2</sub> )<br>R22(CNH <sub>2</sub> <sup>δ+</sup> )<br>S18 (COH <sup>δ+</sup> )                                                                                                                | ionic<br>ion-polar<br>ion-polar                                          |
| <i>Binding site 3</i><br>Affinity: -3.2 kcal/mol | II-C=O <sup>δ-</sup><br>PC head hydrophobic surface                                                                                                                          | W19 (CNH <sup>δ+</sup> C)<br>V8, L13, A14, L16                                                                                                                                                                            | hydrogen<br>hydrophobic                                                  |
| <i>Binding site 4</i><br>Affinity: -3.2 kcal/mol | II-C=O <sup>δ-</sup><br>PO <sub>4</sub> <sup>-</sup><br>PC head hydrophobic surface                                                                                          | G12 (NH <sup>δ+</sup> <sub>pb</sub> )<br>L16 (NH <sup>δ+</sup> <sub>pb</sub> )<br>V8, W19                                                                                                                                 | hydrogen<br>ion-polar<br>hydrophobic                                     |
| <i>Binding site 5</i><br>Affinity: -3.1 kcal/mol | PO <sub>4</sub> <sup>-</sup><br>PO <sub>4</sub> <sup>-</sup><br>II-C=O <sup>δ-</sup>                                                                                         | R22(CN <sup>+</sup> H <sub>2</sub> )<br>R22(CNH <sub>2</sub> <sup>δ+</sup> )<br>W19 (CNH <sup>δ+</sup> C)                                                                                                                 | ionic<br>ion-polar<br>hydrogen                                           |
| <i>Binding site 6</i><br>Affinity: -3.1 kcal/mol | II-C=O <sup>δ-</sup><br>PC head hydrophobic surface                                                                                                                          | K21 (N <sup>+</sup> H <sub>3</sub> )<br>L6, L9, L13                                                                                                                                                                       | ion-polar<br>hydrophobic                                                 |
| <i>Binding site 7</i>                            | I-C=O <sup>δ-</sup>                                                                                                                                                          | R22(C=N <sup>+</sup> H <sub>2</sub> )                                                                                                                                                                                     | ion-polar                                                                |

|                                                  |                                                                                                                                              |                                                                                                                                                                                              |                                                             |
|--------------------------------------------------|----------------------------------------------------------------------------------------------------------------------------------------------|----------------------------------------------------------------------------------------------------------------------------------------------------------------------------------------------|-------------------------------------------------------------|
| Affinity: -3.1 kcal/mol                          | II-C=O <sup>δ-</sup><br>PC head hydrophobic surface                                                                                          | W19 (CNH <sup>δ+</sup> C)<br>V8, L13, L16                                                                                                                                                    | hydrogen<br>hydrophobic                                     |
| <i>Binding site 8</i><br>Affinity: -3.1 kcal/mol | I-C=O <sup>δ-</sup><br>II-C=O <sup>δ-</sup><br>II-C=O <sup>δ-</sup><br>PC head hydrophobic surface                                           | W19 (CNH <sup>δ+</sup> C)<br>R22(C=N <sup>+</sup> H <sub>2</sub> )<br>R22(CNH <sub>2</sub> <sup>δ+</sup> )<br>V8, L13, L16                                                                   | hydrogen<br>ion-polar<br>hydrogen<br>hydrophobic            |
| <i>Binding site 9</i><br>Affinity: -3.1 kcal/mol | PO <sub>4</sub> <sup>-</sup><br>PO <sub>4</sub> <sup>-</sup><br>PO <sub>4</sub> <sup>-</sup><br>1-CO <sup>δ-</sup> C<br>2-CO <sup>δ-</sup> C | R22(CNH <sub>2</sub> <sup>δ+</sup> )<br>R22 (CNH <sup>δ+</sup> C)<br>Q26 (CNH <sub>2</sub> <sup>δ+</sup> )<br>Q26 (CNH <sub>2</sub> <sup>δ+</sup> )<br>Q26 (CNH <sub>2</sub> <sup>δ+</sup> ) | ion-polar<br>ion-polar<br>ion-polar<br>hydrogen<br>hydrogen |

**Table S4.** Summary of the charged and polar groups of amino acid residues in the melittin binding sites that interact with polar head groups of truncated PA. Hypothetical binding sites in melittin that bind to the charged and polar groups of PA polar head were determined by AutoDock modeling. Designation of PA polar head groups is shown in Figure S1. Pb in NH<sup>δ+</sup><sub>pb</sub> denotes a peptide bond.

| <b>Binding Site # and Affinity Energy Values</b> | <b>PA Polar Head Groups</b>                                                                                                                  | <b>Melittin a. a. Residues Interacting with PA Head</b>                                                                                                                                       | <b>Bond Type</b>                                            |
|--------------------------------------------------|----------------------------------------------------------------------------------------------------------------------------------------------|-----------------------------------------------------------------------------------------------------------------------------------------------------------------------------------------------|-------------------------------------------------------------|
| <i>Binding site 1</i><br>Affinity: -3.5 kcal/mol | PO <sub>4</sub> <sup>-</sup><br>PO <sub>4</sub> <sup>-</sup><br>I-C=O <sup>δ-</sup>                                                          | R22 (C=N <sup>+</sup> H <sub>2</sub> )<br>R22 (CNH <sub>2</sub> <sup>δ+</sup> )<br>W19 (CNH <sup>δ+</sup> C)                                                                                  | ionic<br>ion-polar<br>hydrogen                              |
| <i>Binding site 2</i><br>Affinity: -3.4 kcal/mol | PO <sub>4</sub> <sup>-</sup><br>PO <sub>4</sub> <sup>-</sup>                                                                                 | R22 (C=N <sup>+</sup> H <sub>2</sub> )<br>R22 (CNH <sub>2</sub> <sup>δ+</sup> )                                                                                                               | ionic<br>ion-polar                                          |
| <i>Binding site 3</i><br>Affinity: -3.4 kcal/mol | PO <sub>4</sub> <sup>-</sup><br>II-C=O <sup>δ-</sup><br>II-C=O <sup>δ-</sup>                                                                 | L16 (NH <sup>δ+</sup> <sub>pb</sub> )<br>R22 (C=N <sup>+</sup> H <sub>2</sub> )<br>R22 (CNH <sub>2</sub> <sup>δ+</sup> )                                                                      | ion-polar<br>ion-polar<br>hydrogen                          |
| <i>Binding site 4</i><br>Affinity: -3.3 kcal/mol | PO <sub>4</sub> <sup>-</sup><br>PO <sub>4</sub> <sup>-</sup><br>1-CO <sup>δ-</sup> C                                                         | R22 (C=N <sup>+</sup> H <sub>2</sub> )<br>R22 (CNH <sub>2</sub> <sup>δ+</sup> )<br>R22 (CNH <sub>2</sub> <sup>δ+</sup> )                                                                      | ionic<br>ion-polar<br>hydrogen                              |
| <i>Binding site 5</i><br>Affinity: -3.3 kcal/mol | PO <sub>4</sub> <sup>-</sup><br>PO <sub>4</sub> <sup>-</sup><br>PO <sub>4</sub> <sup>-</sup><br>1-CO <sup>δ-</sup> C<br>2-CO <sup>δ-</sup> C | R22 (CNH <sub>2</sub> <sup>δ+</sup> )<br>R22 (CNH <sup>δ+</sup> C)<br>Q26 (CNH <sub>2</sub> <sup>δ+</sup> )<br>Q26 (CNH <sub>2</sub> <sup>δ+</sup> )<br>Q26 (CNH <sub>2</sub> <sup>δ+</sup> ) | ion-polar<br>ion-polar<br>ion-polar<br>hydrogen<br>hydrogen |

|                                                  |                                                                                              |                                                                                                              |                                   |
|--------------------------------------------------|----------------------------------------------------------------------------------------------|--------------------------------------------------------------------------------------------------------------|-----------------------------------|
| <i>Binding site 6</i><br>Affinity: -3.3 kcal/mol | PO <sub>4</sub> <sup>-</sup><br>PO <sub>4</sub> <sup>-</sup><br>PO <sub>4</sub> <sup>-</sup> | R22 (C=N <sup>+</sup> H <sub>2</sub> )<br>R22 (CNH <sub>2</sub> <sup>δ+</sup> )<br>S18 (COH <sup>δ+</sup> )  | ionic<br>ion-polar<br>ion-polar   |
| <i>Binding site 7</i><br>Affinity: -3.2 kcal/mol | PO <sub>4</sub> <sup>-</sup><br>1-CO <sup>δ-</sup> -C                                        | R22 (CNH <sub>2</sub> <sup>δ+</sup> )<br>W19 (CNH <sup>δ+</sup> +C)                                          | ion-polar<br>hydrogen             |
| <i>Binding site 8</i><br>Affinity: -3.2 kcal/mol | PO <sub>4</sub> <sup>-</sup><br>I-C=O <sup>δ-</sup><br>II-C=O <sup>δ-</sup>                  | K21 (CN <sup>+</sup> H <sub>3</sub> )<br>Q25 (CNH <sub>2</sub> <sup>δ+</sup> )<br>S18 (COH <sup>δ+</sup> )   | ion-polar<br>hydrogen<br>hydrogen |
| <i>Binding site 9</i><br>Affinity: -3.2 kcal/mol | I-C=O <sup>δ-</sup><br>II-C=O <sup>δ-</sup><br>PO <sub>4</sub> <sup>-</sup>                  | R22 (CNH <sub>2</sub> <sup>δ+</sup> )<br>W19 (CNH <sup>δ+</sup> +C)<br>L16 (NH <sup>δ+</sup> <sub>pb</sub> ) | hydrogen<br>hydrogen<br>ion-polar |

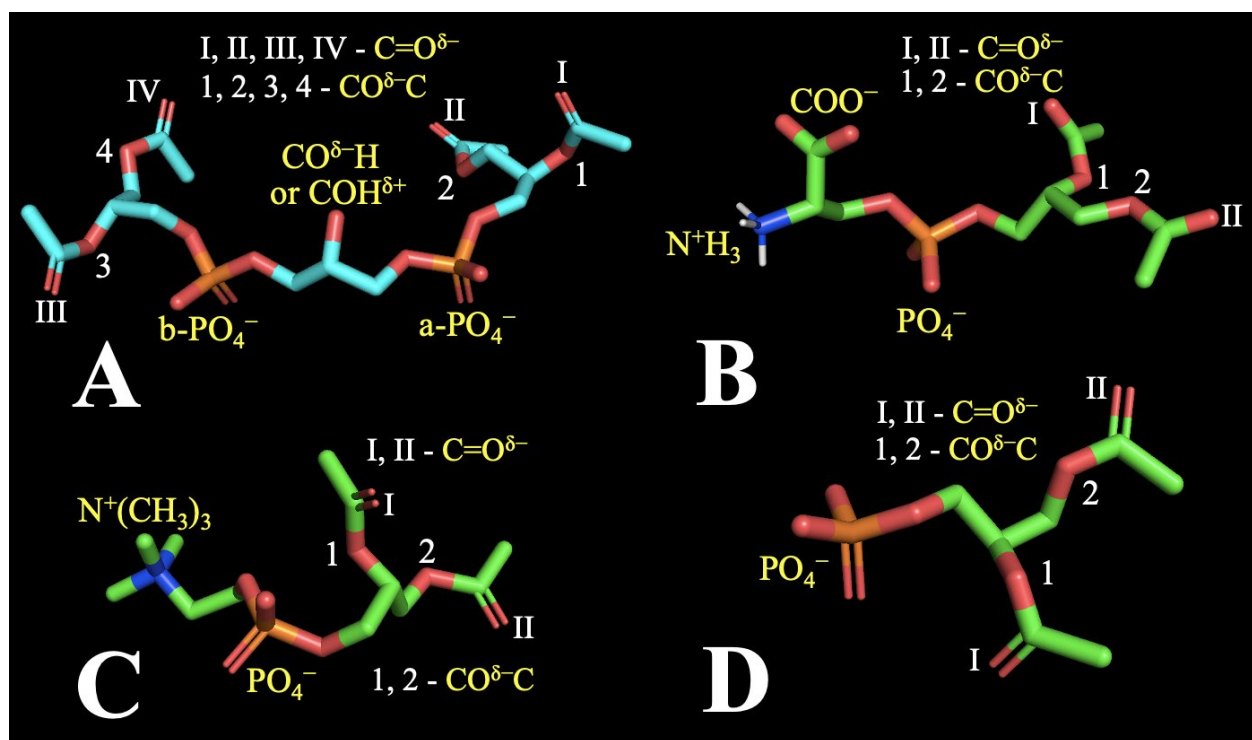

**Figure S1.** Designation of polar head groups (charged and dipolar) of cardiolipin (A), phosphatidylserine (B), phosphatidylcholine (C), and phosphatidic acid (D).
